# Supplementary material
Source: PubMed Central journal article supplement (PMC9873672)

**Figure S1.**

446 patients hospitalised with COVID-19  
(Feb 2020 to March 2021)

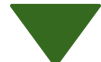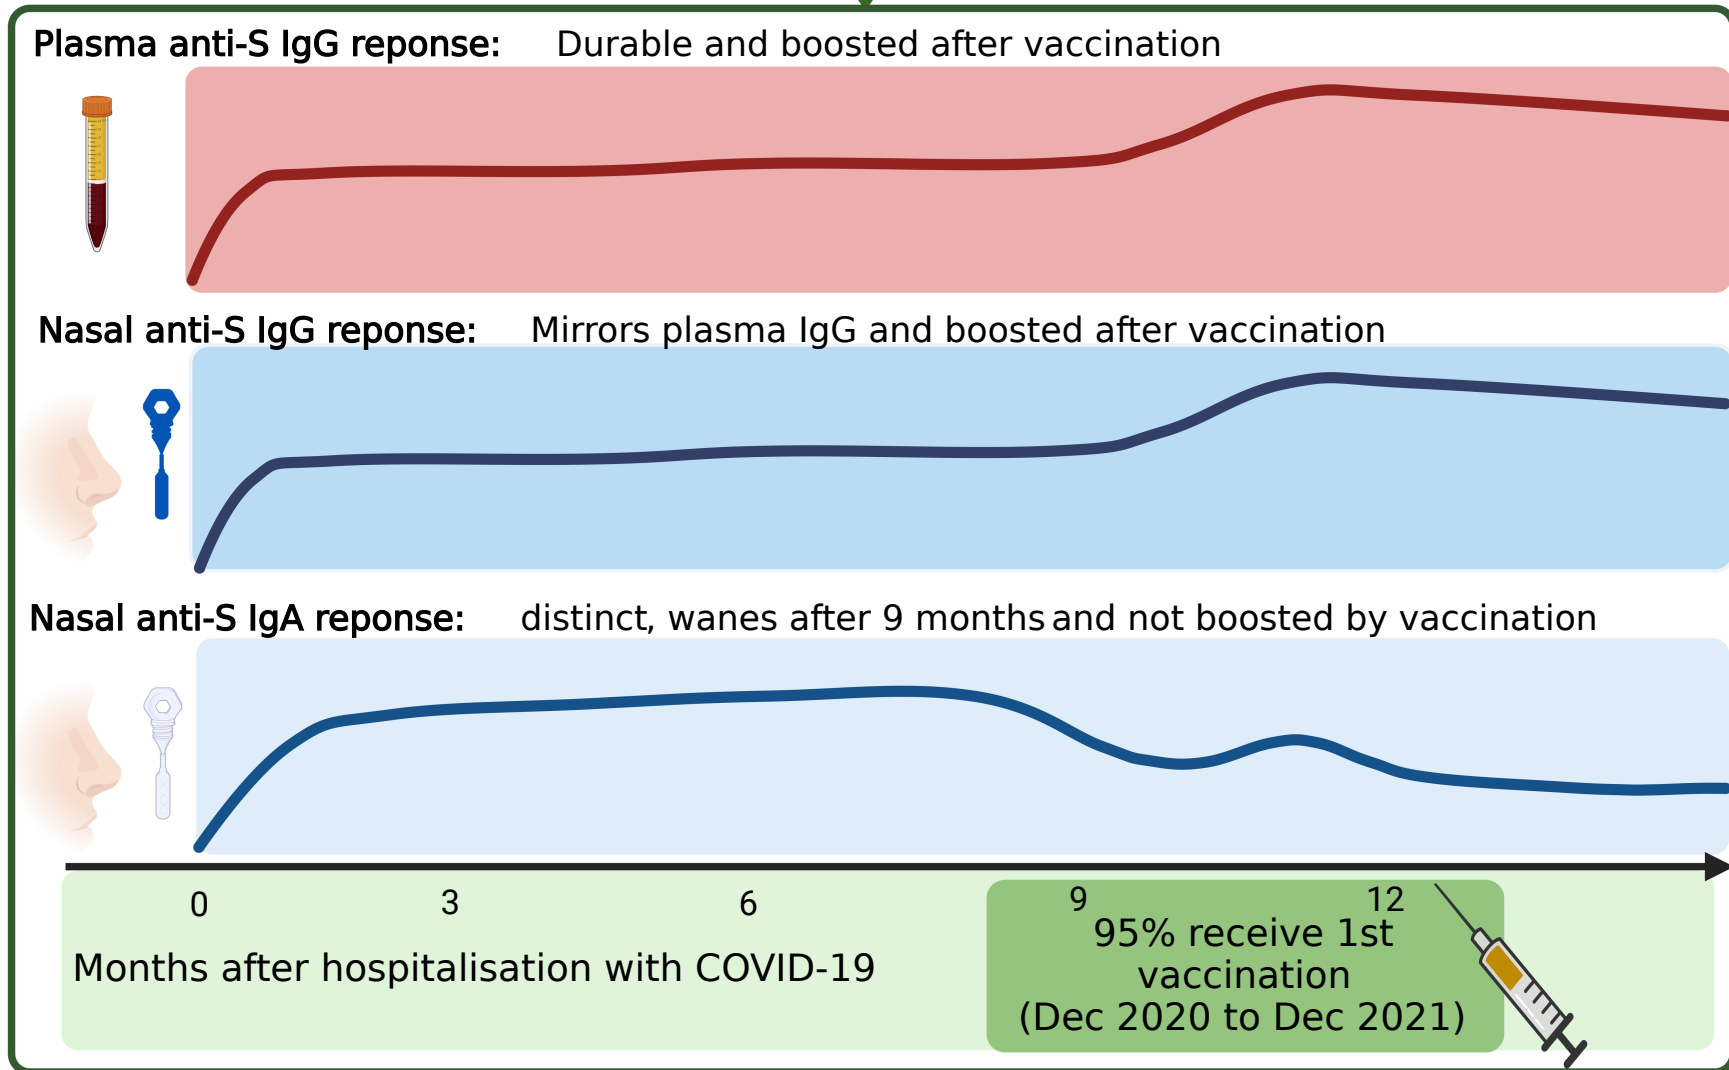

Figure S2.

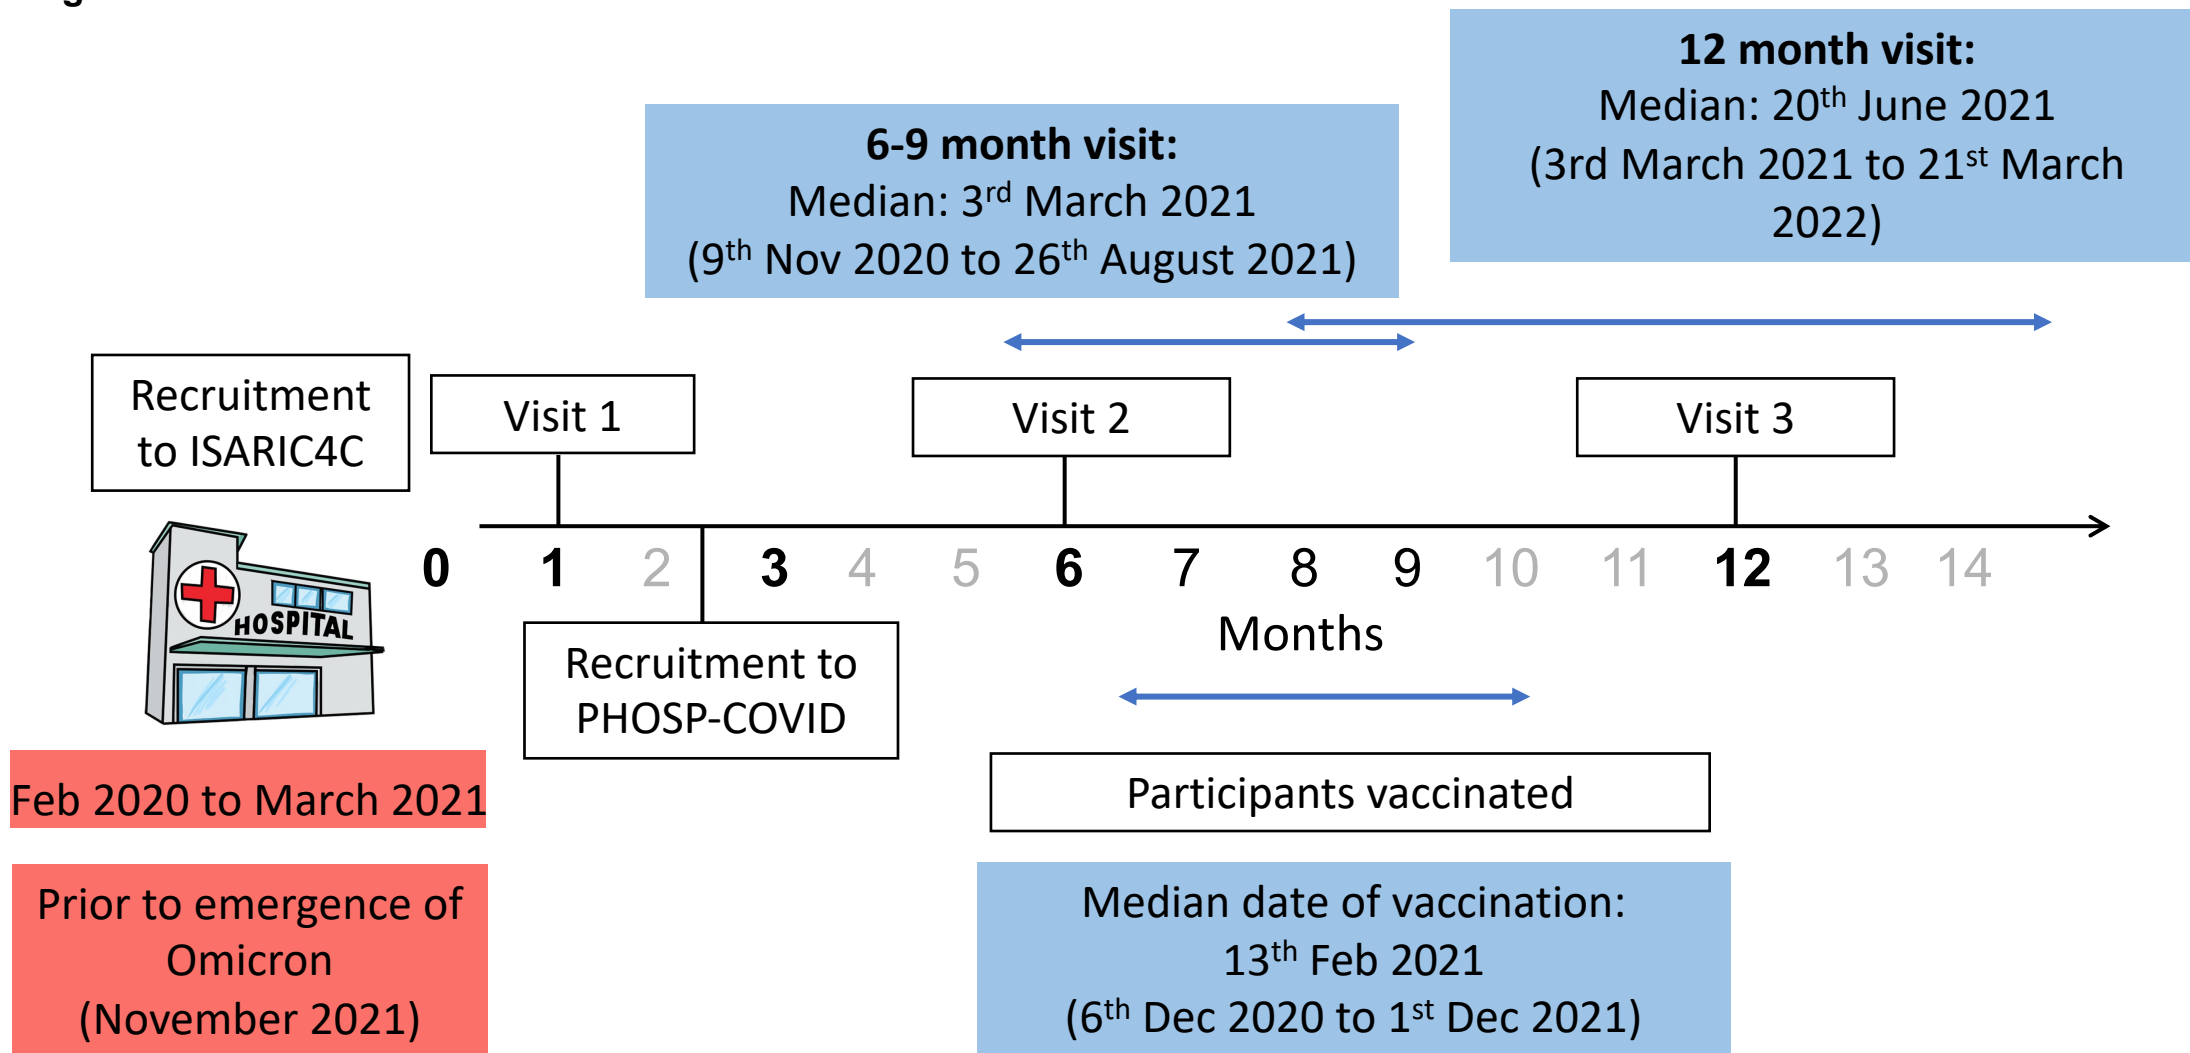

Figure S3.

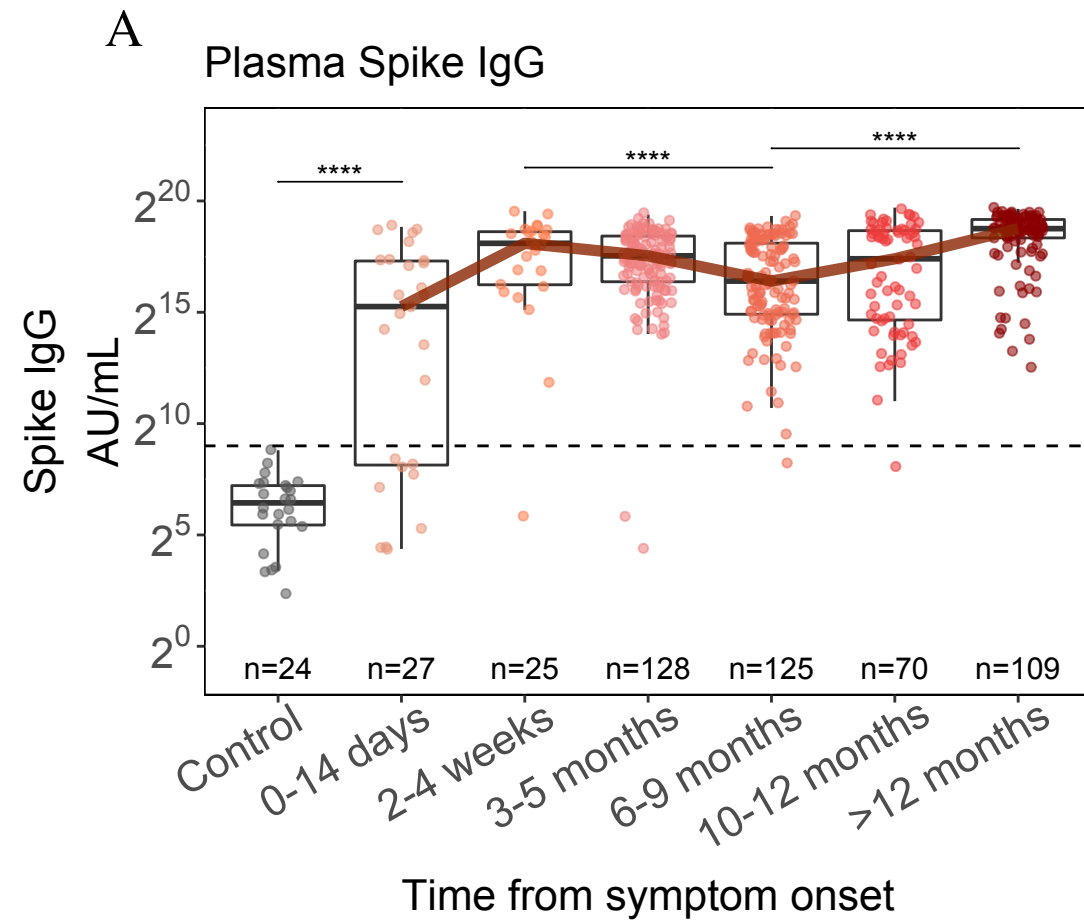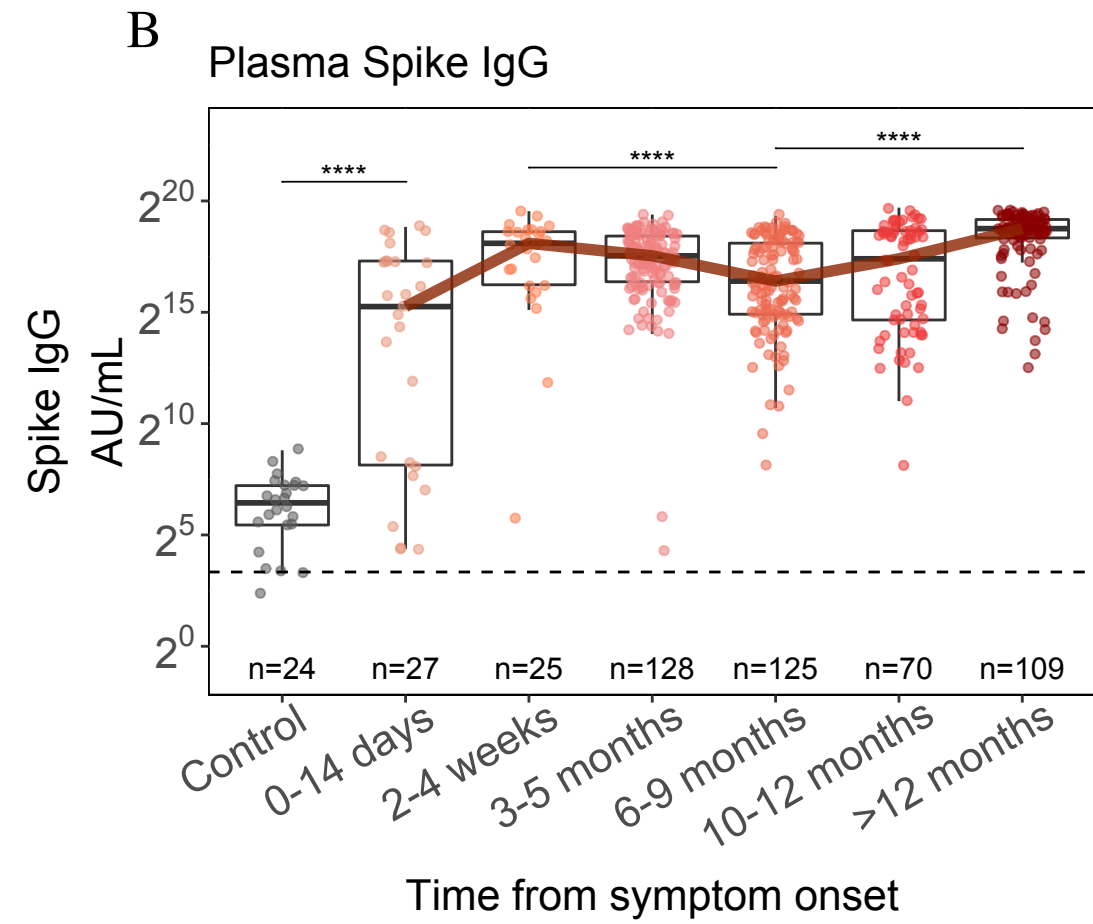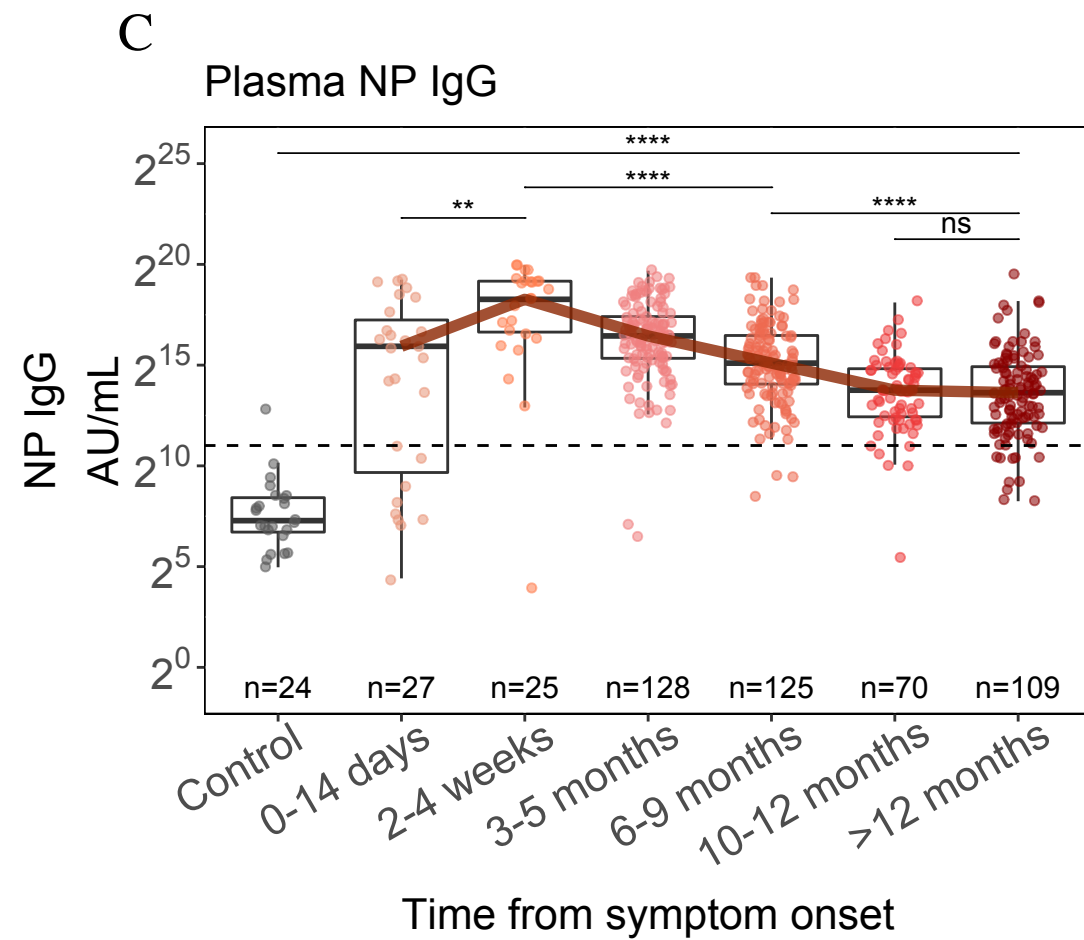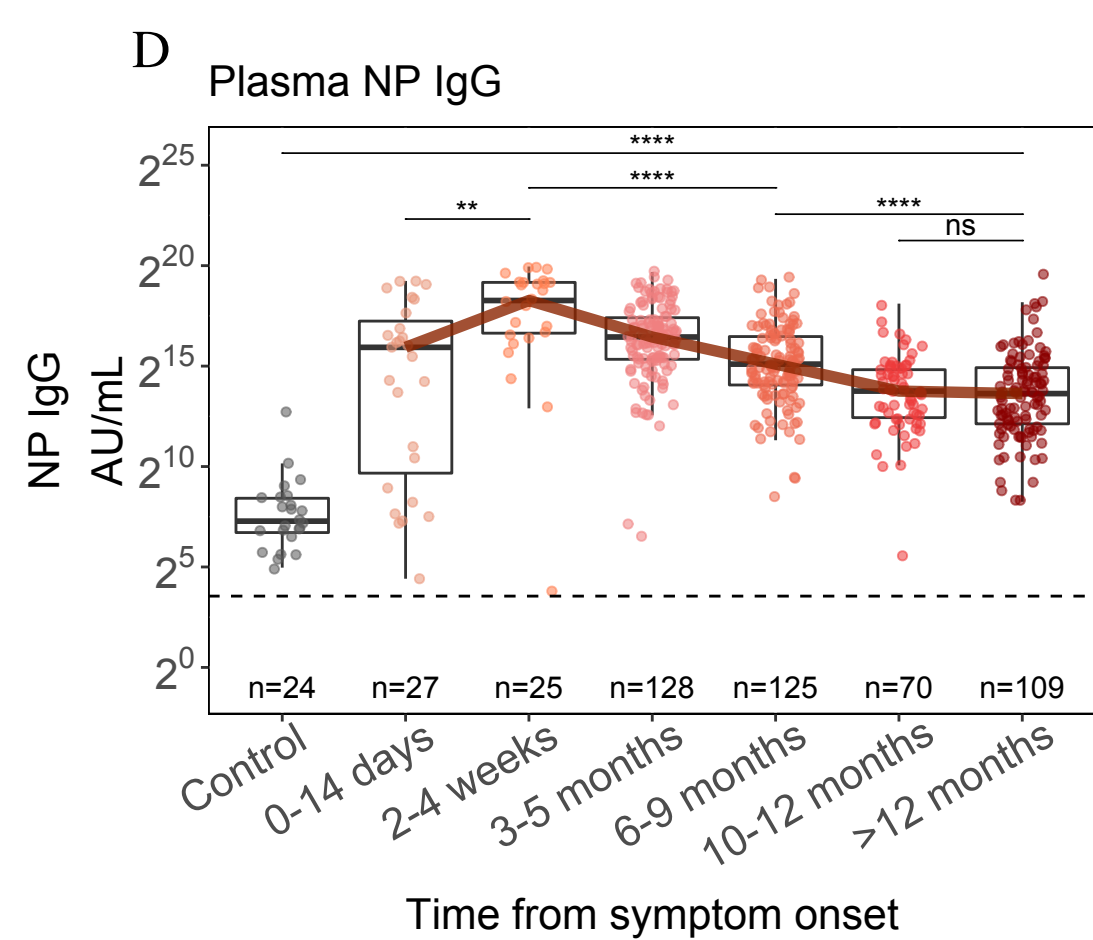

**Figure S4.**

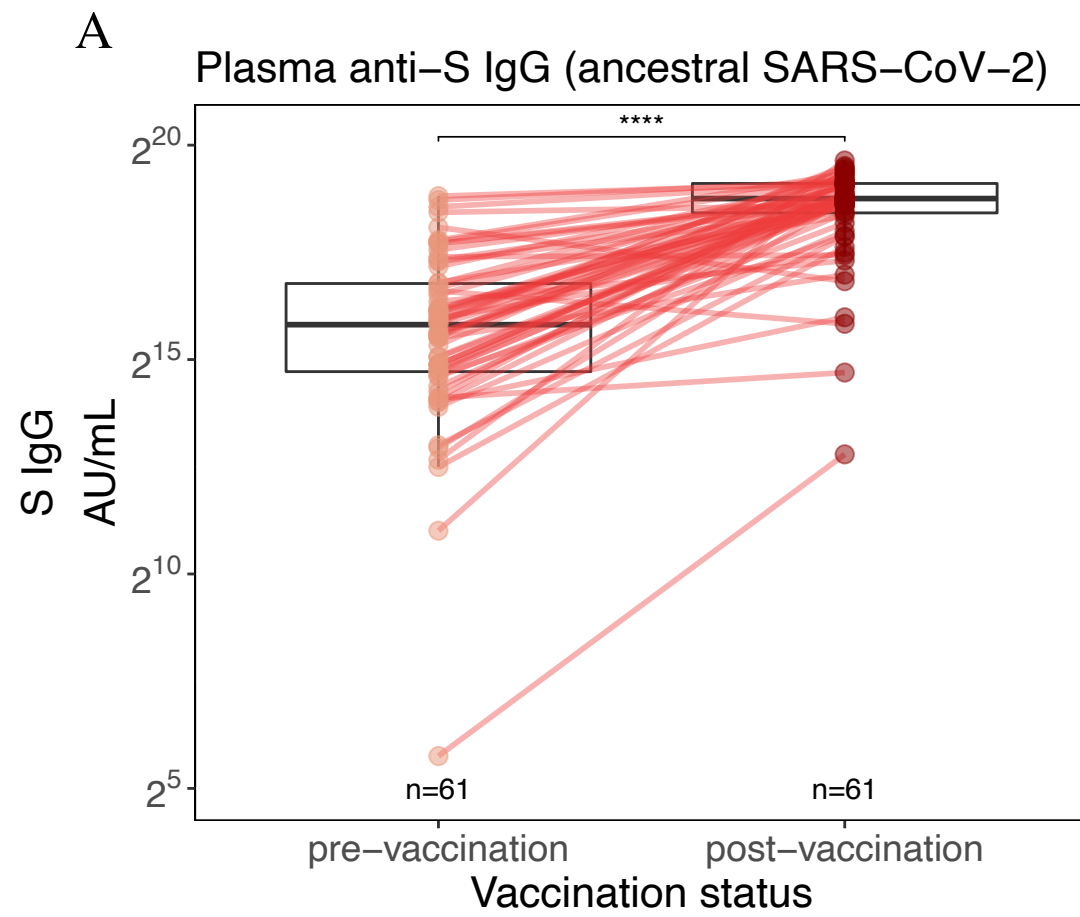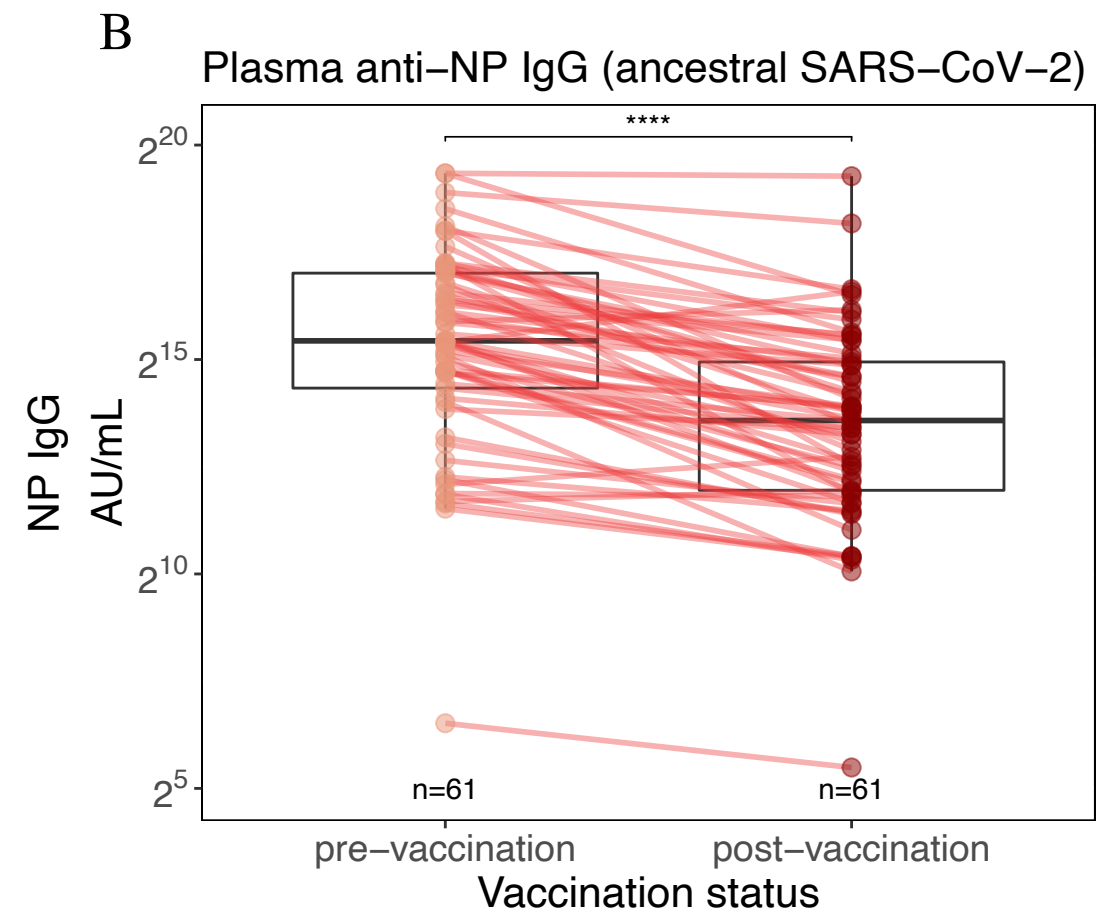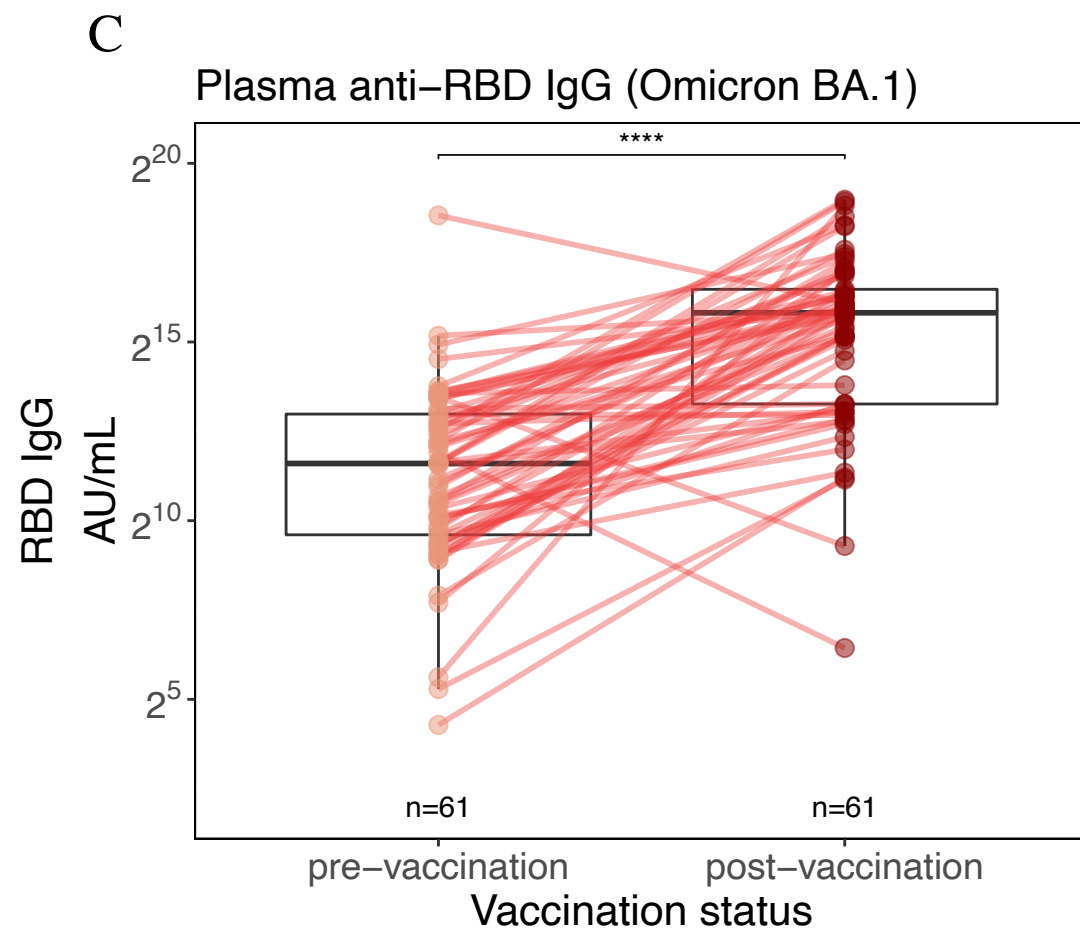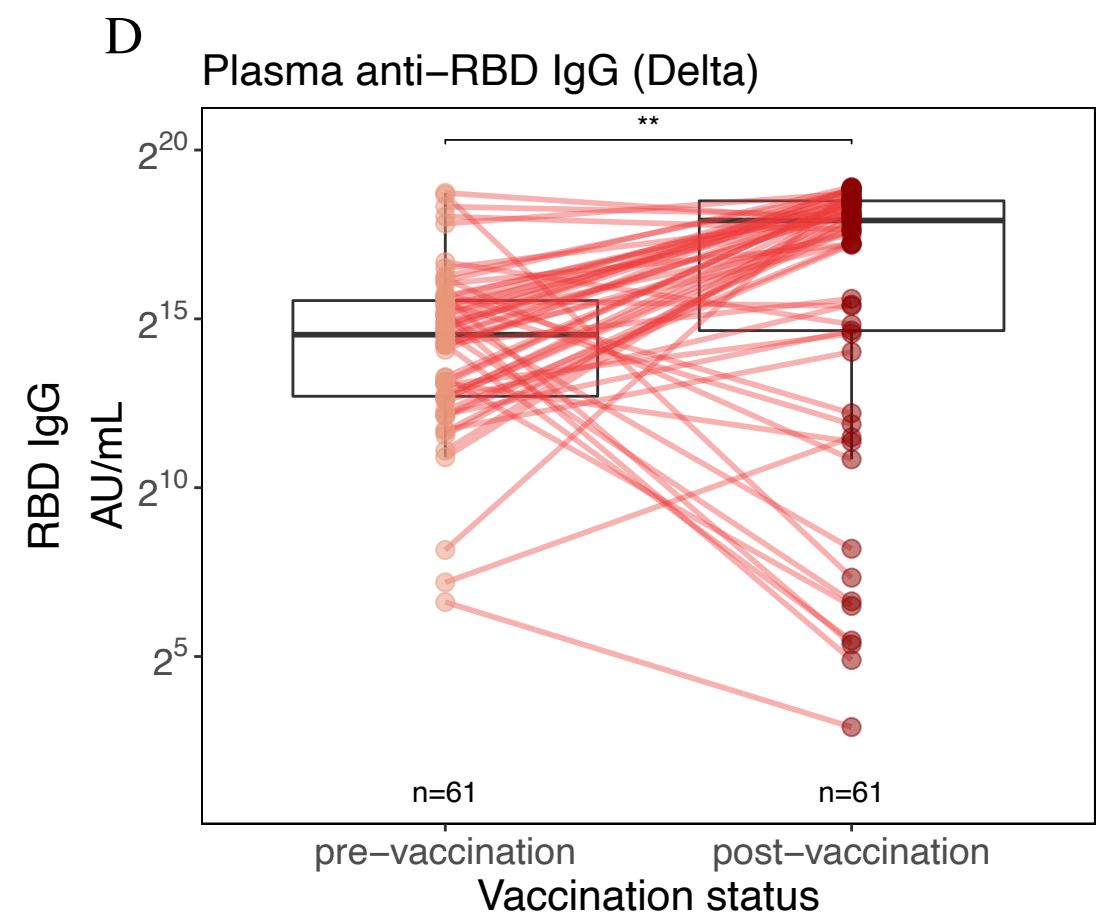



**Figure S5.**

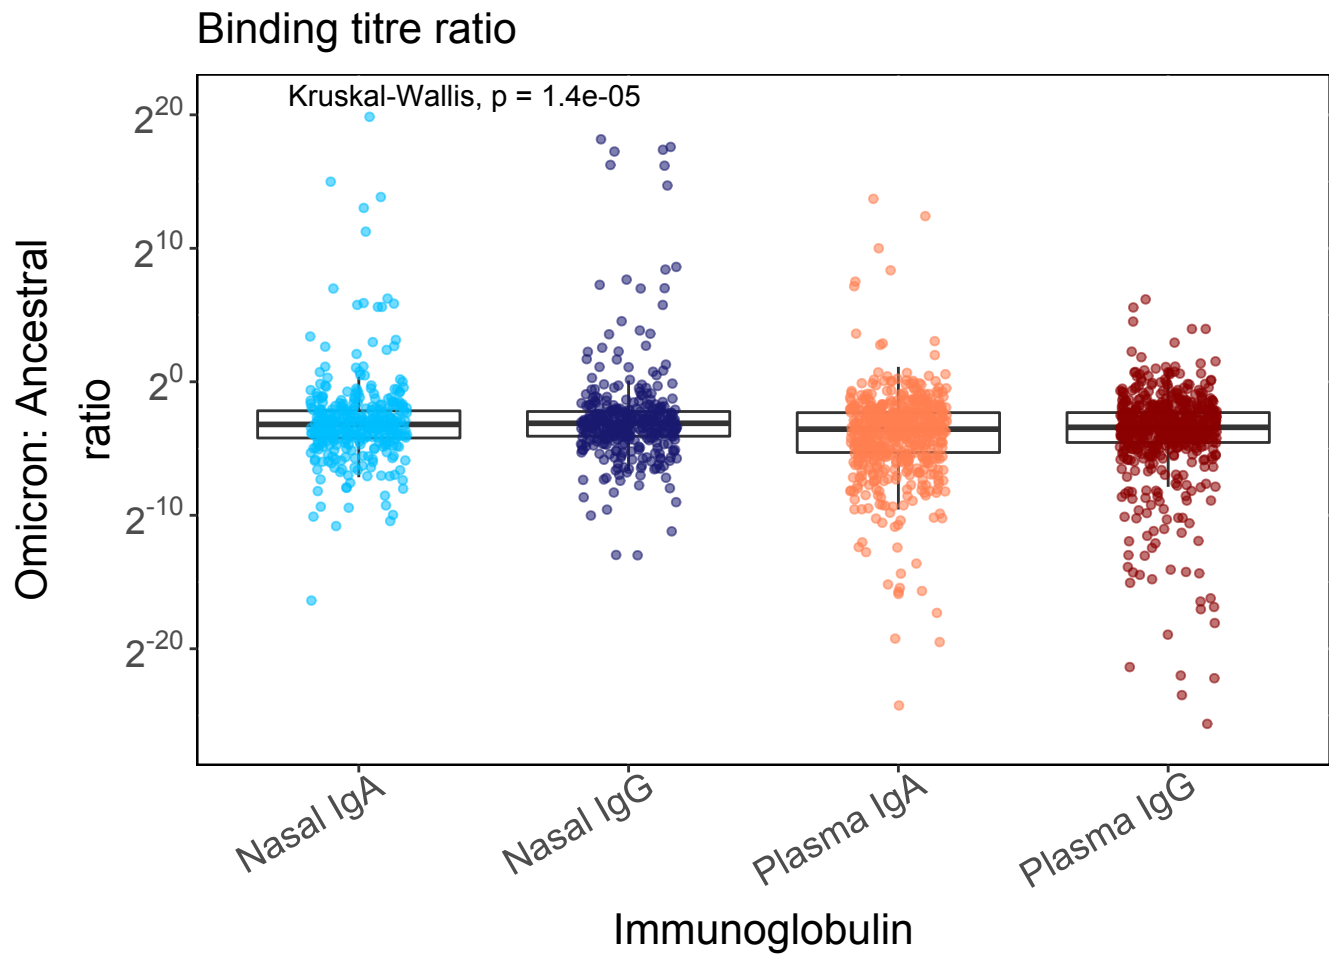

Figure S6.

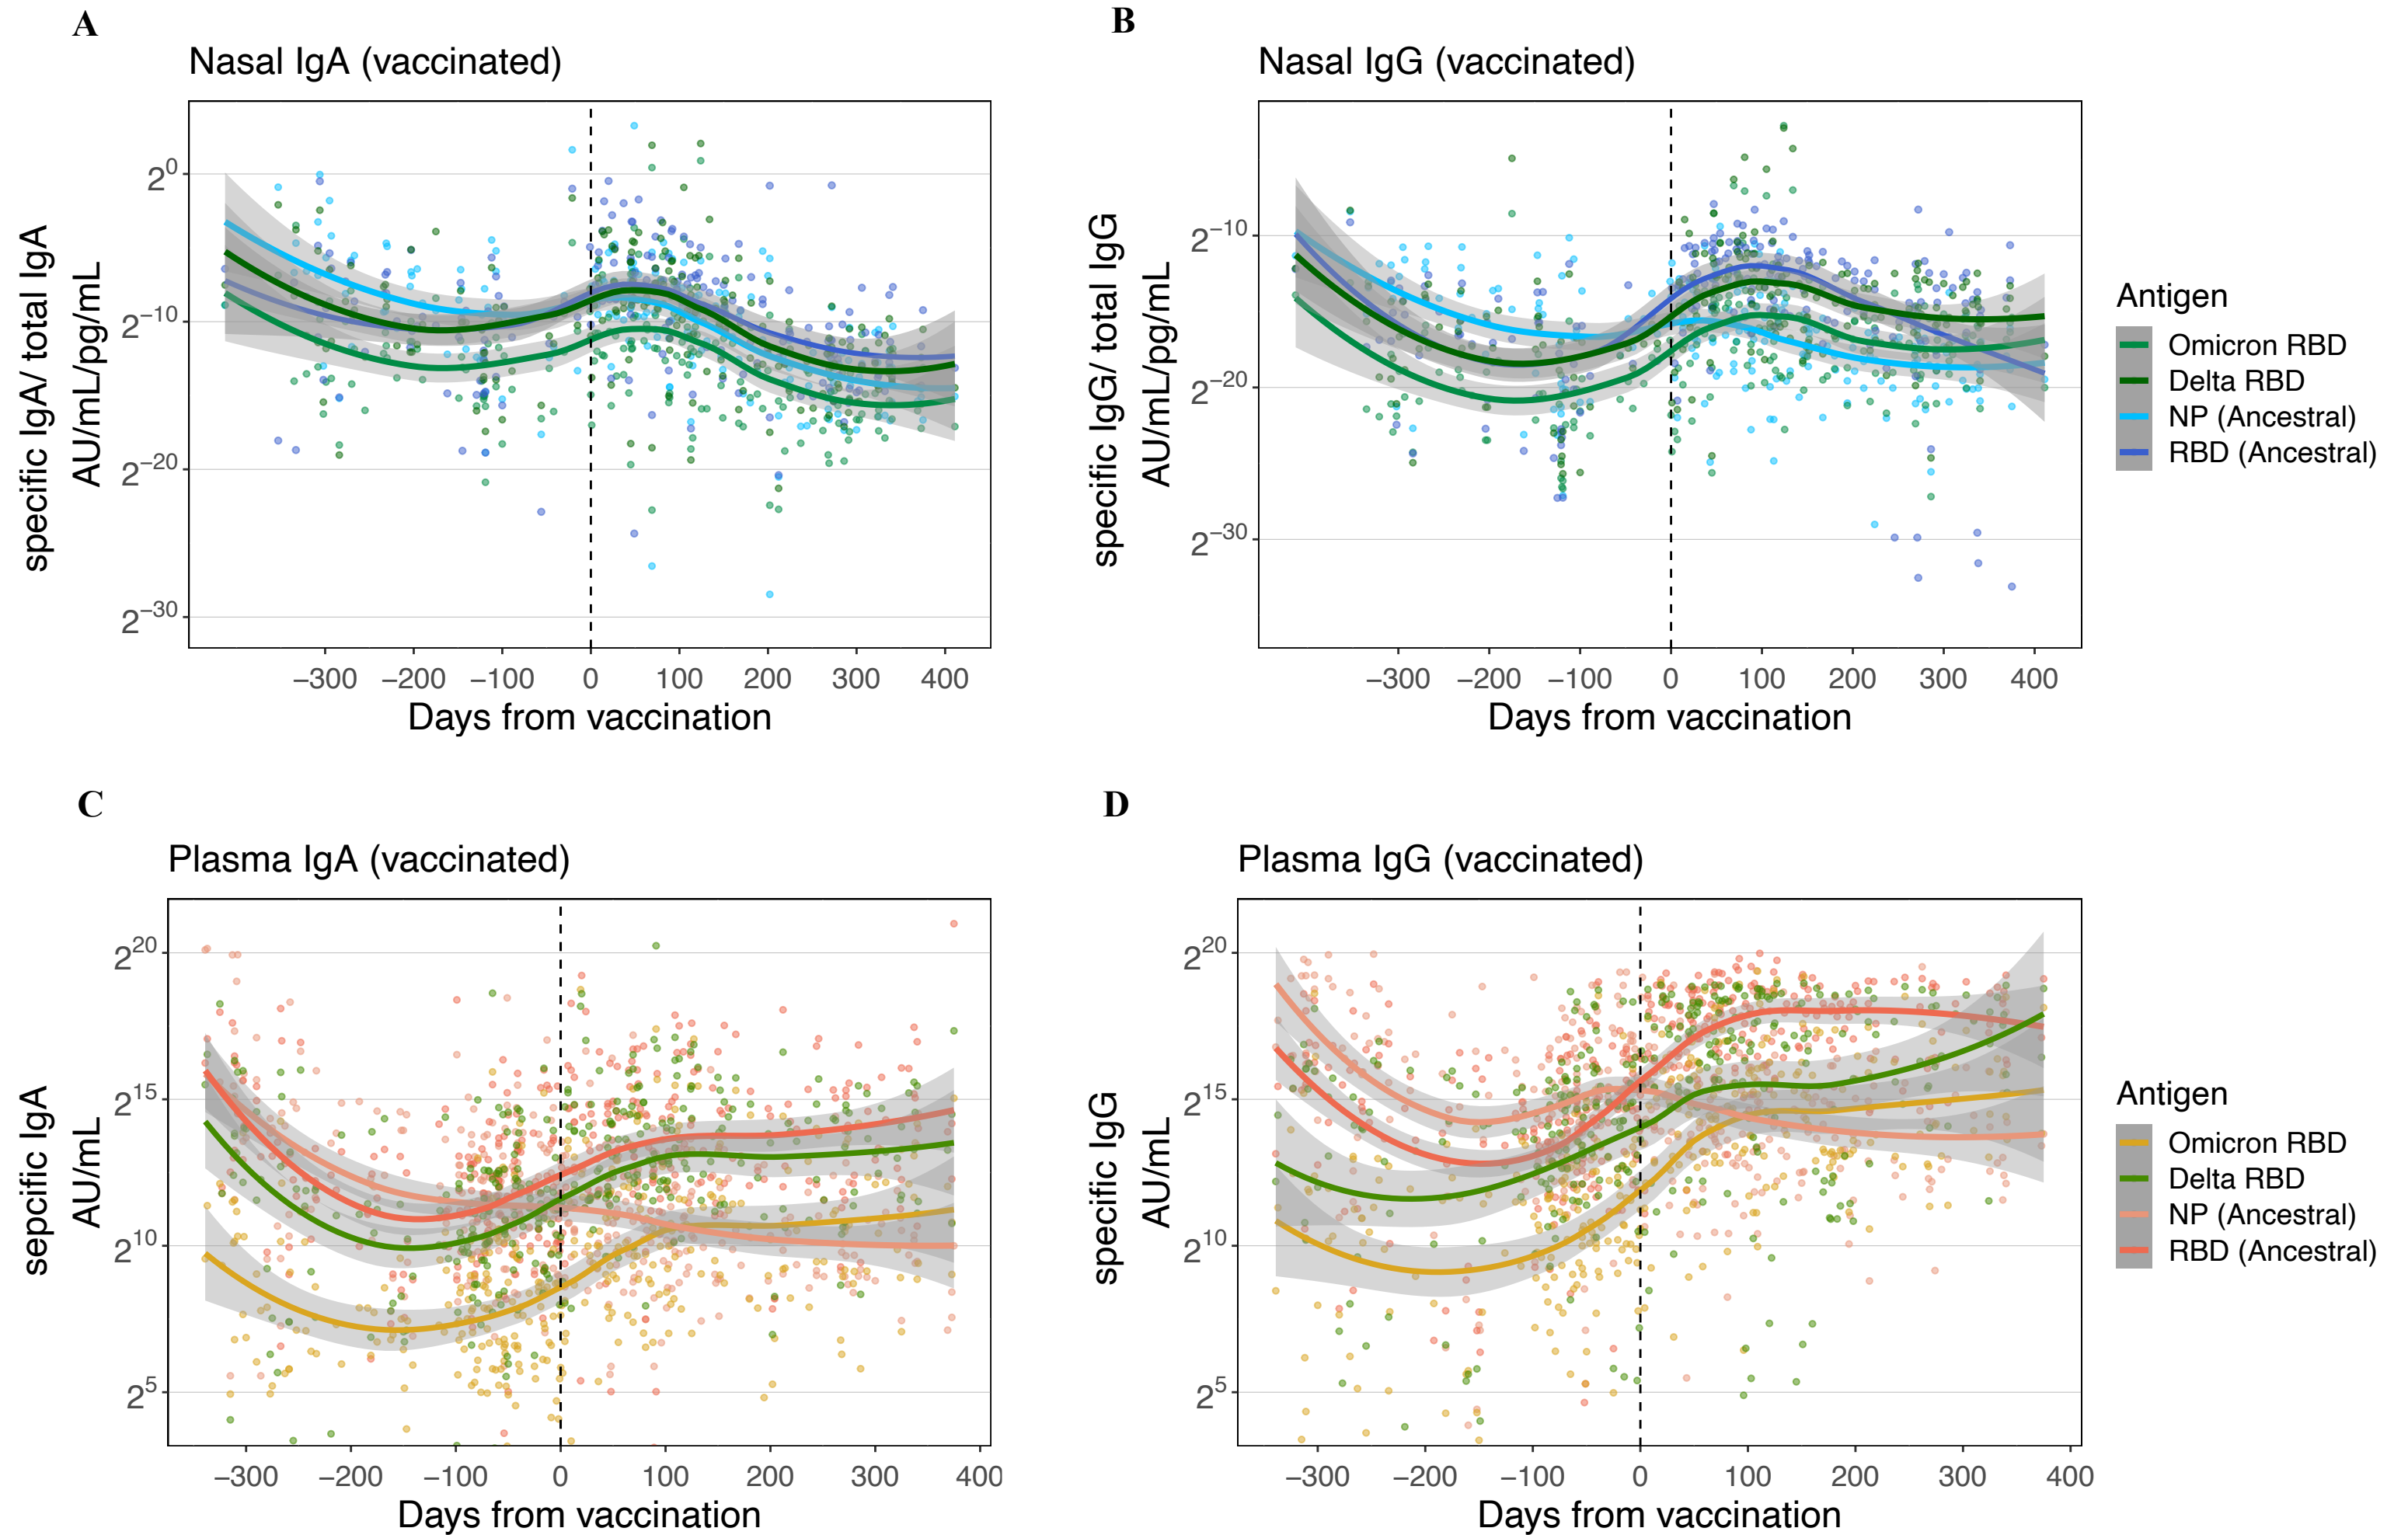

**Figure S7.**

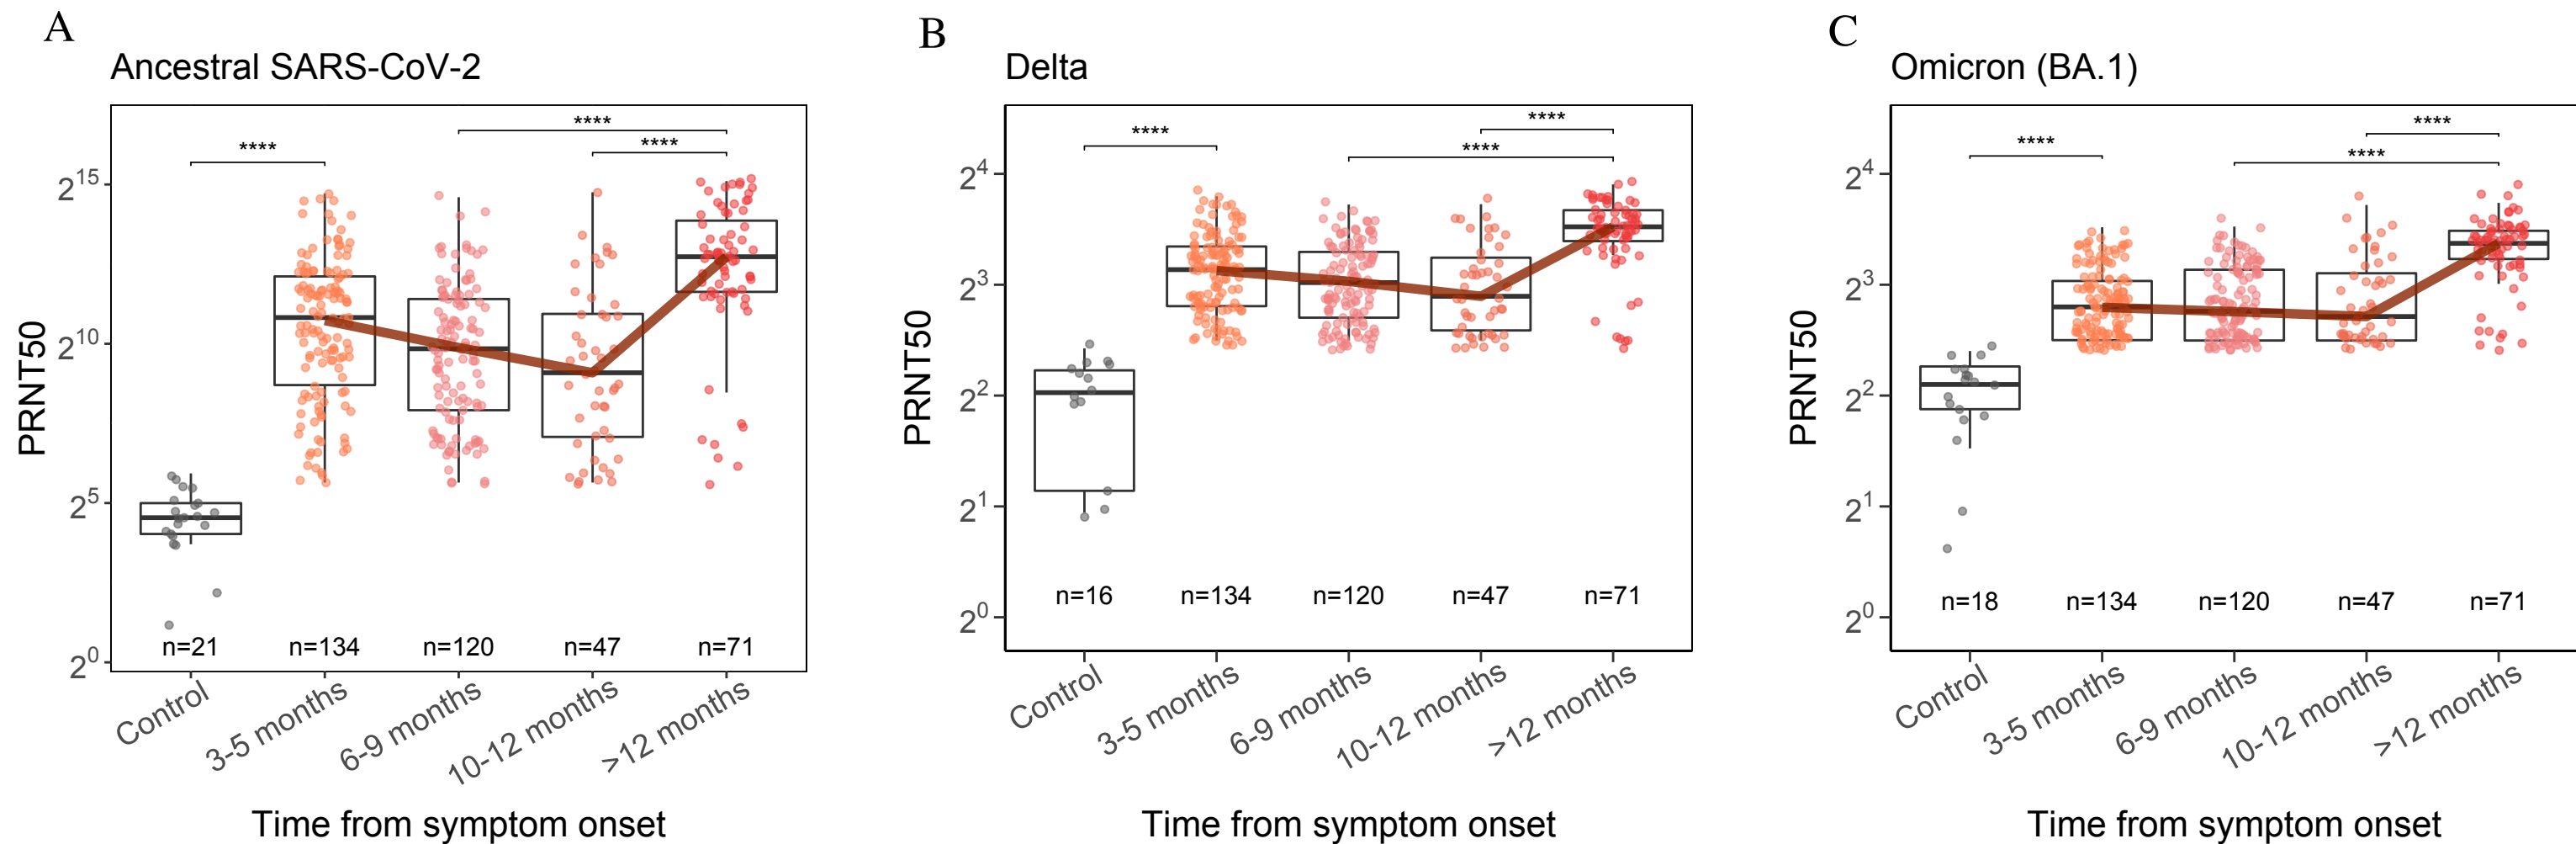

**Figure S8.**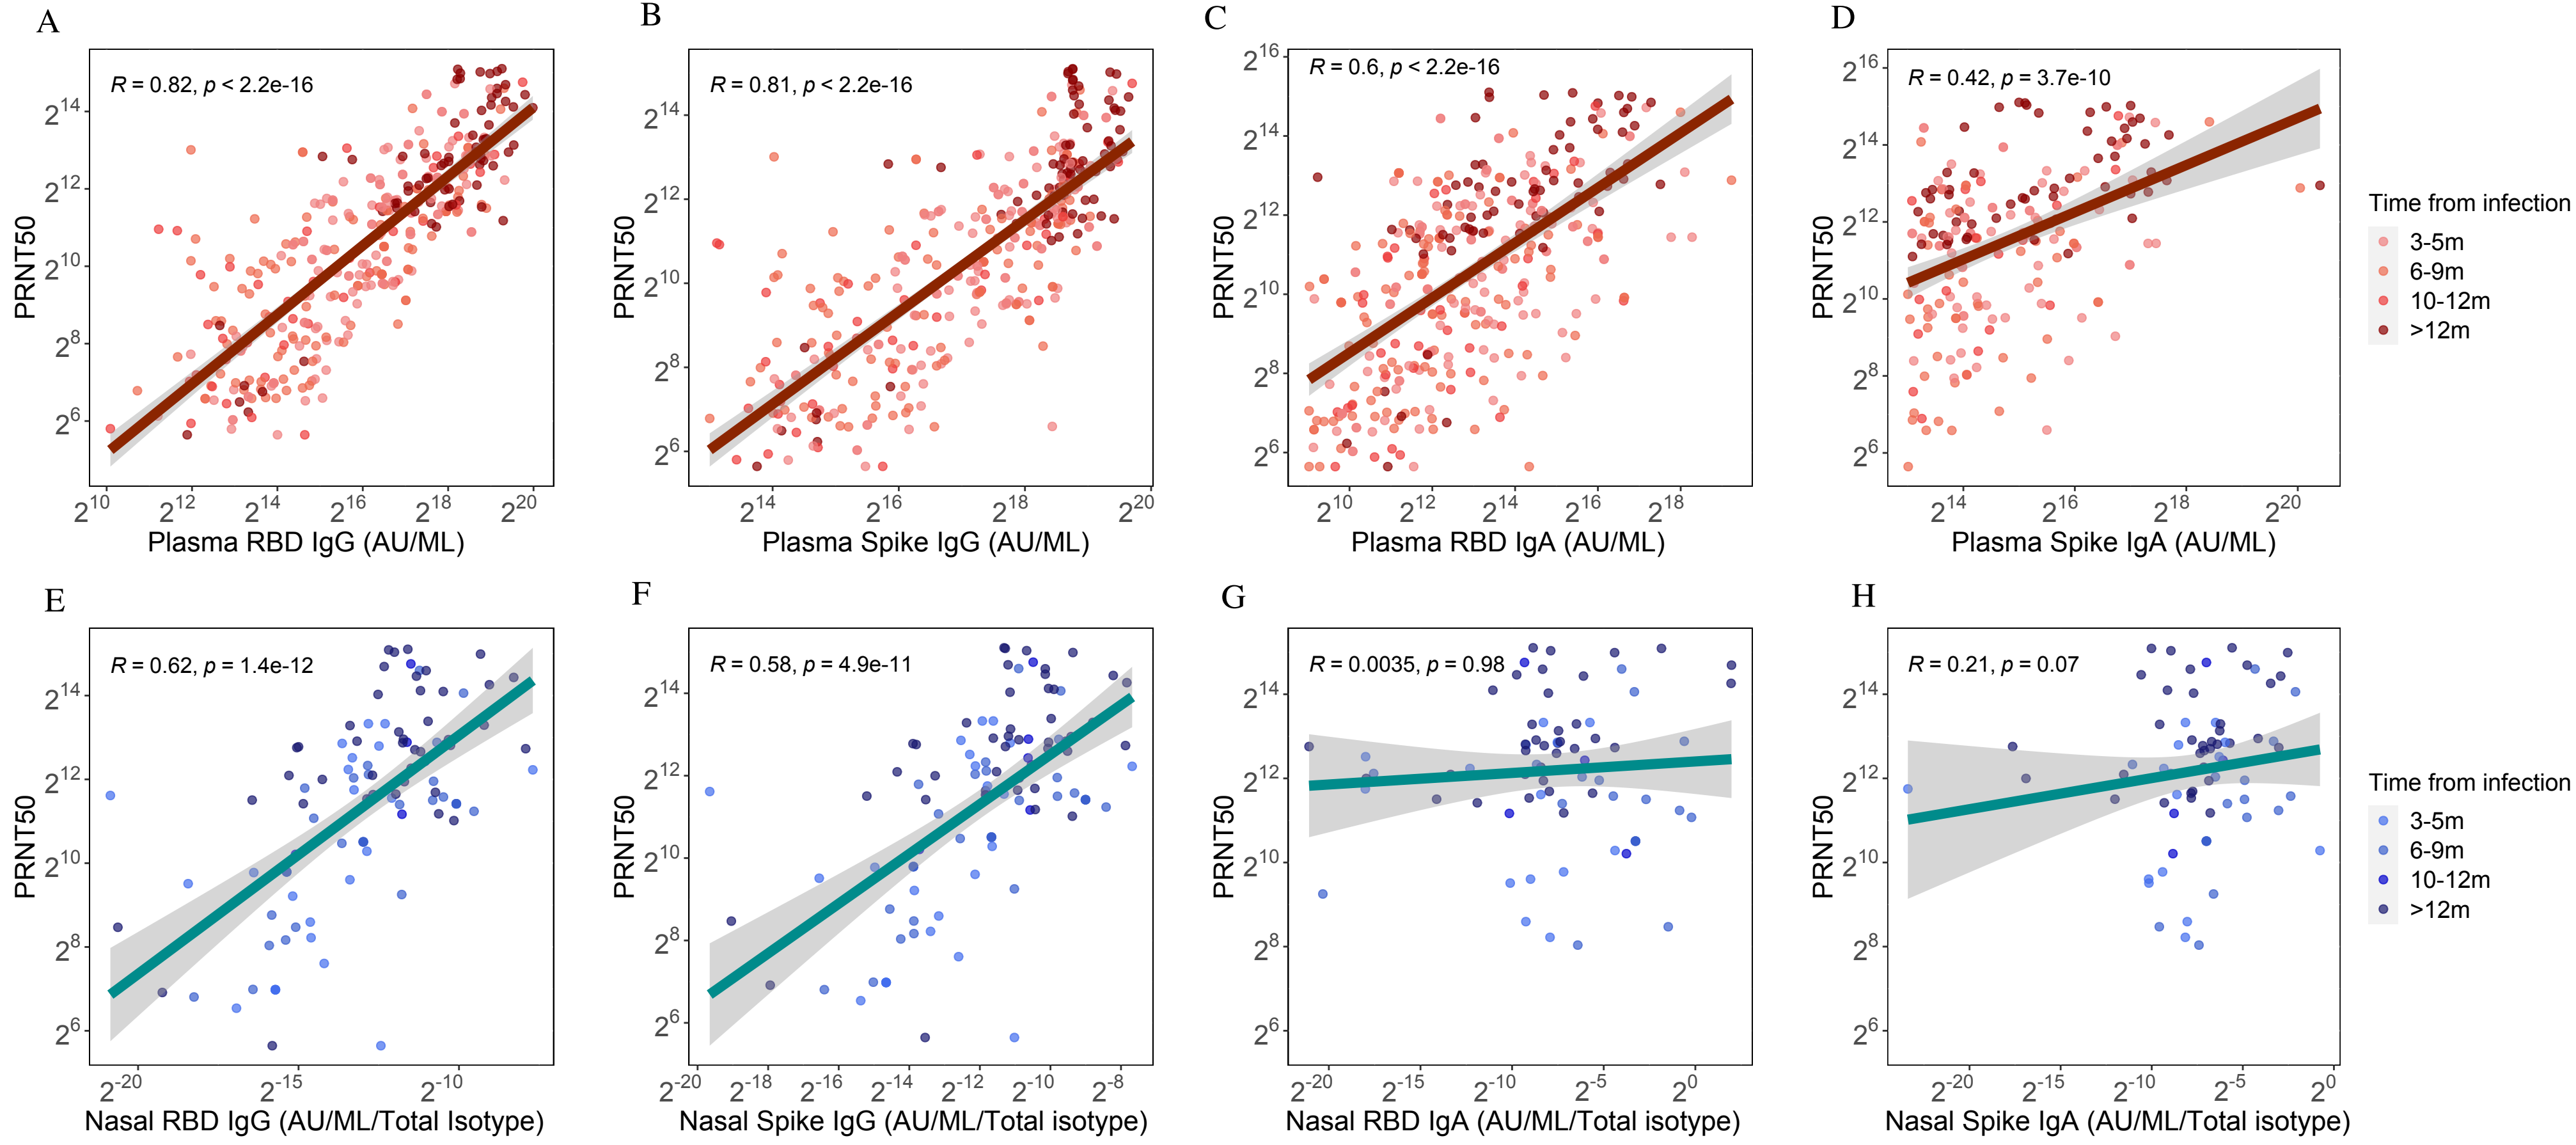

Figure S9.

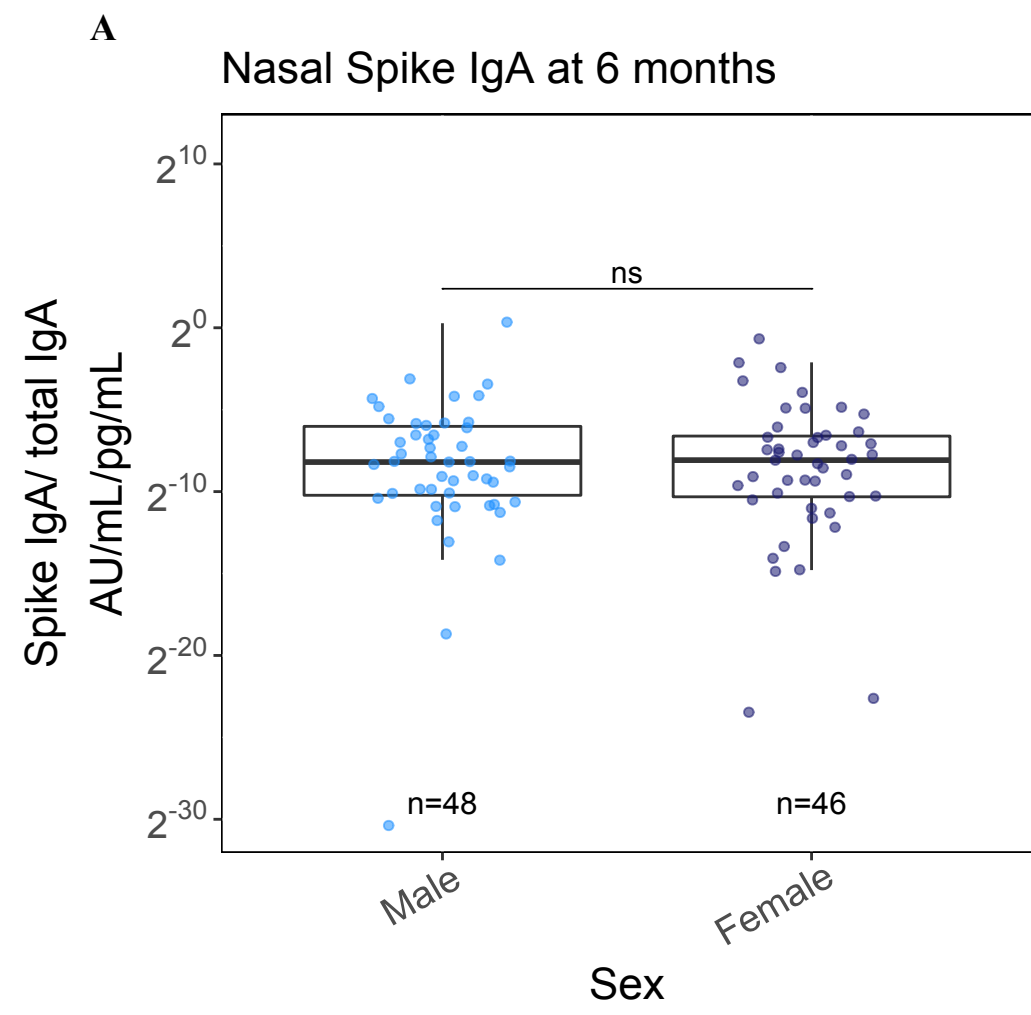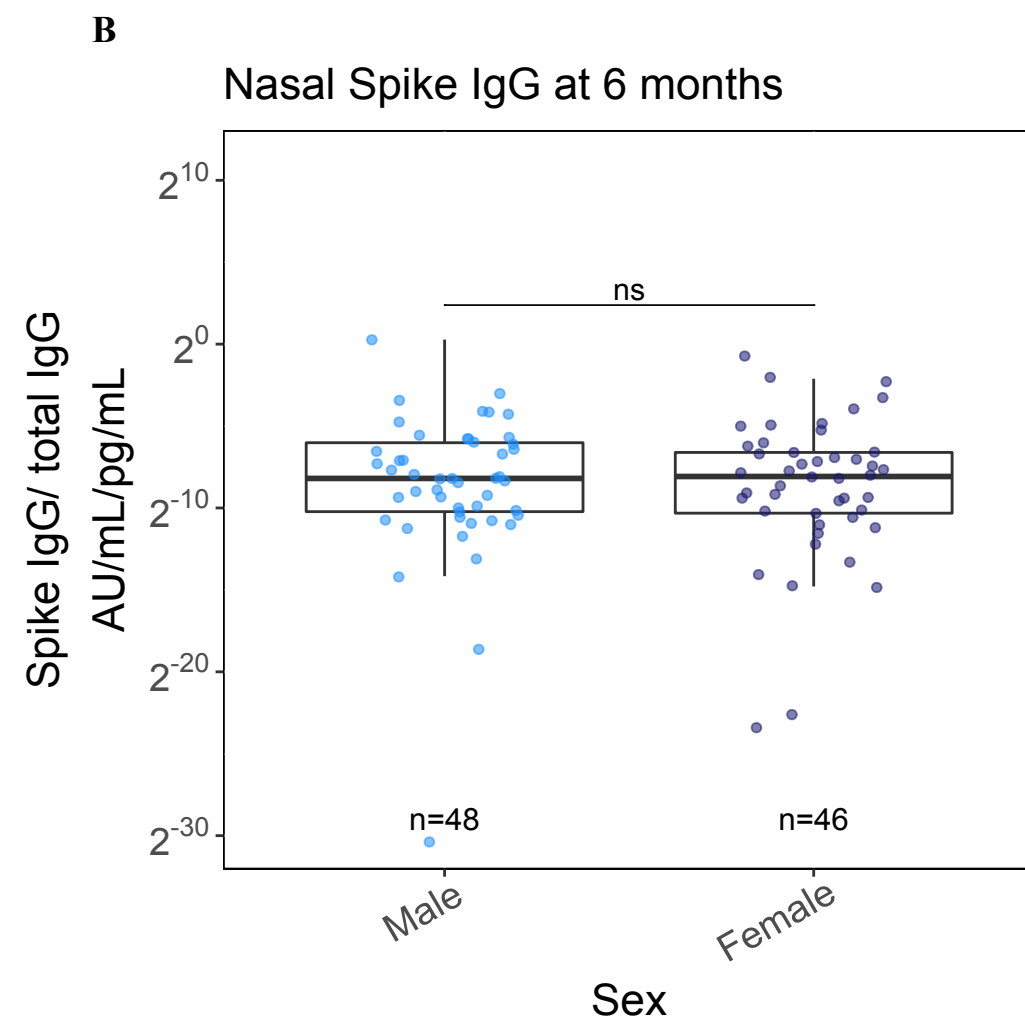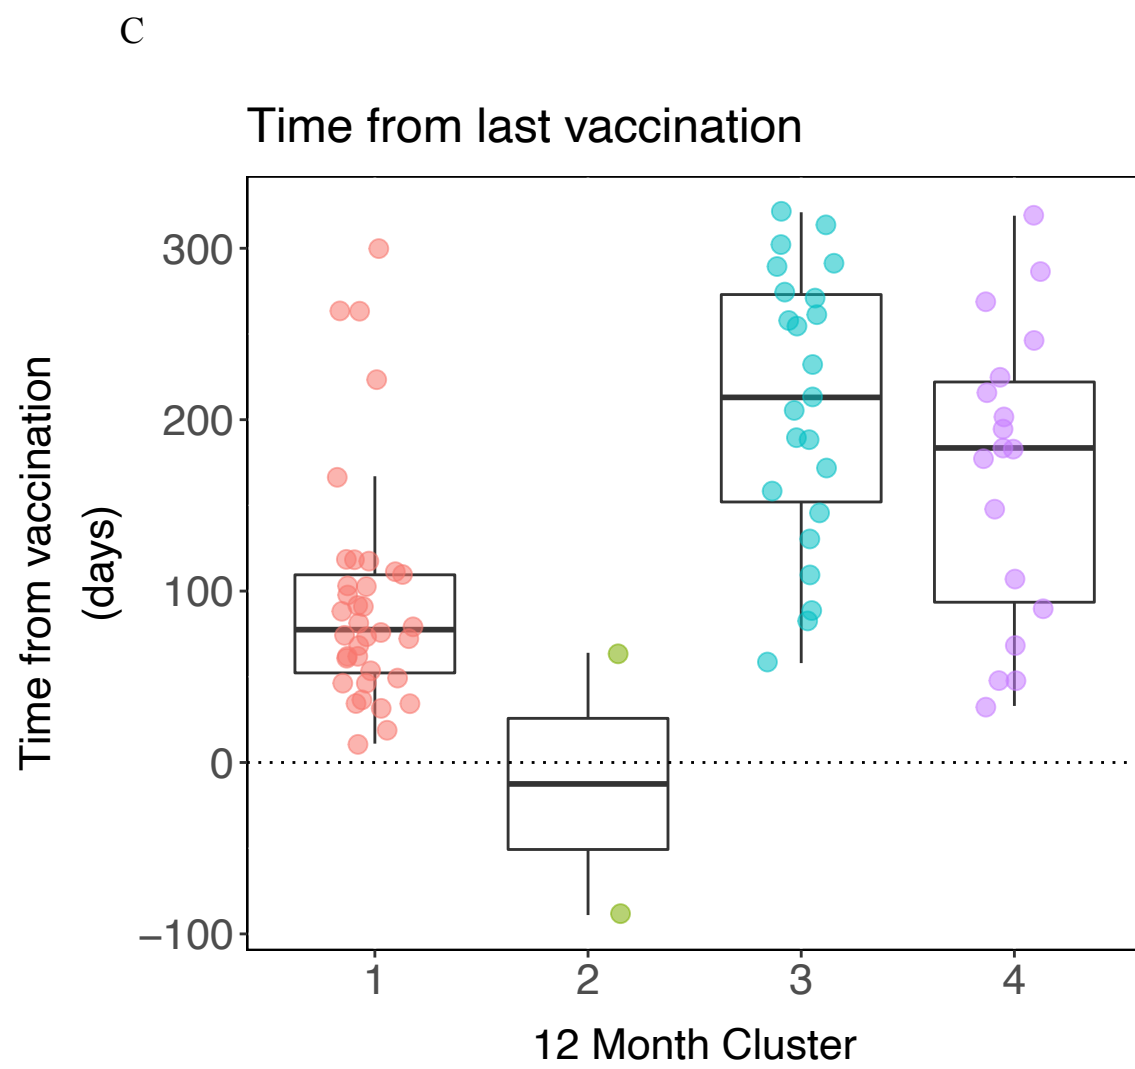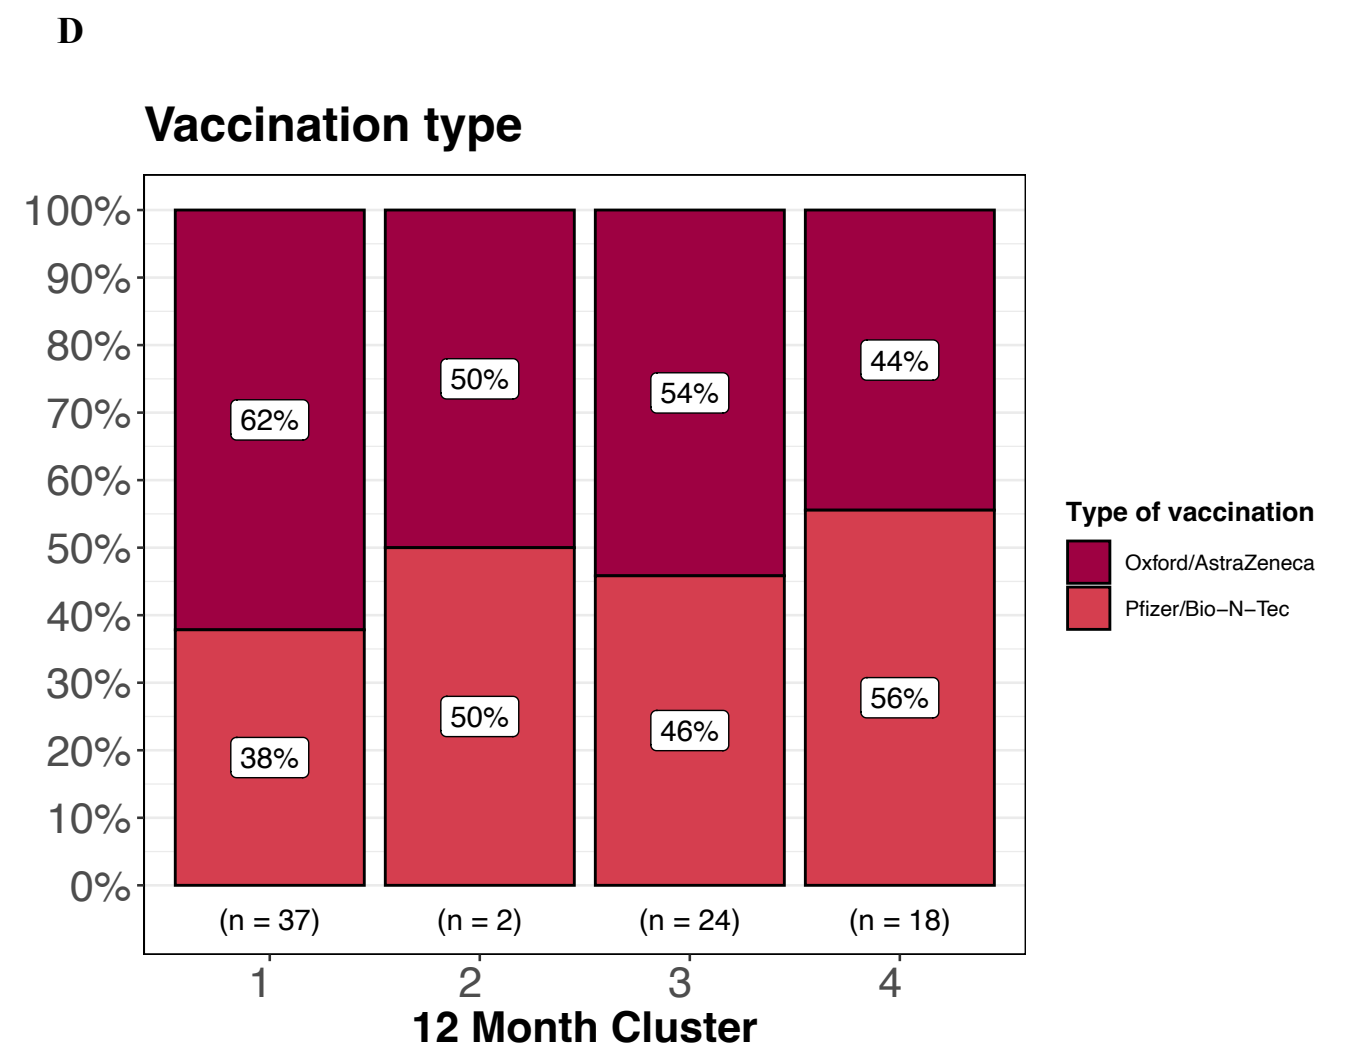

Supplement: mmc1.pdf [file mmc1.pdf]
